# Supplementary figures and images for: Arabidopsis Plastid-RNA Polymerase RPOTp Is Involved in Abiotic Stress Tolerance
Source: MDPI journal article supplement (doi:10.3390/plants9070834), 2020-07-02

Figure S1

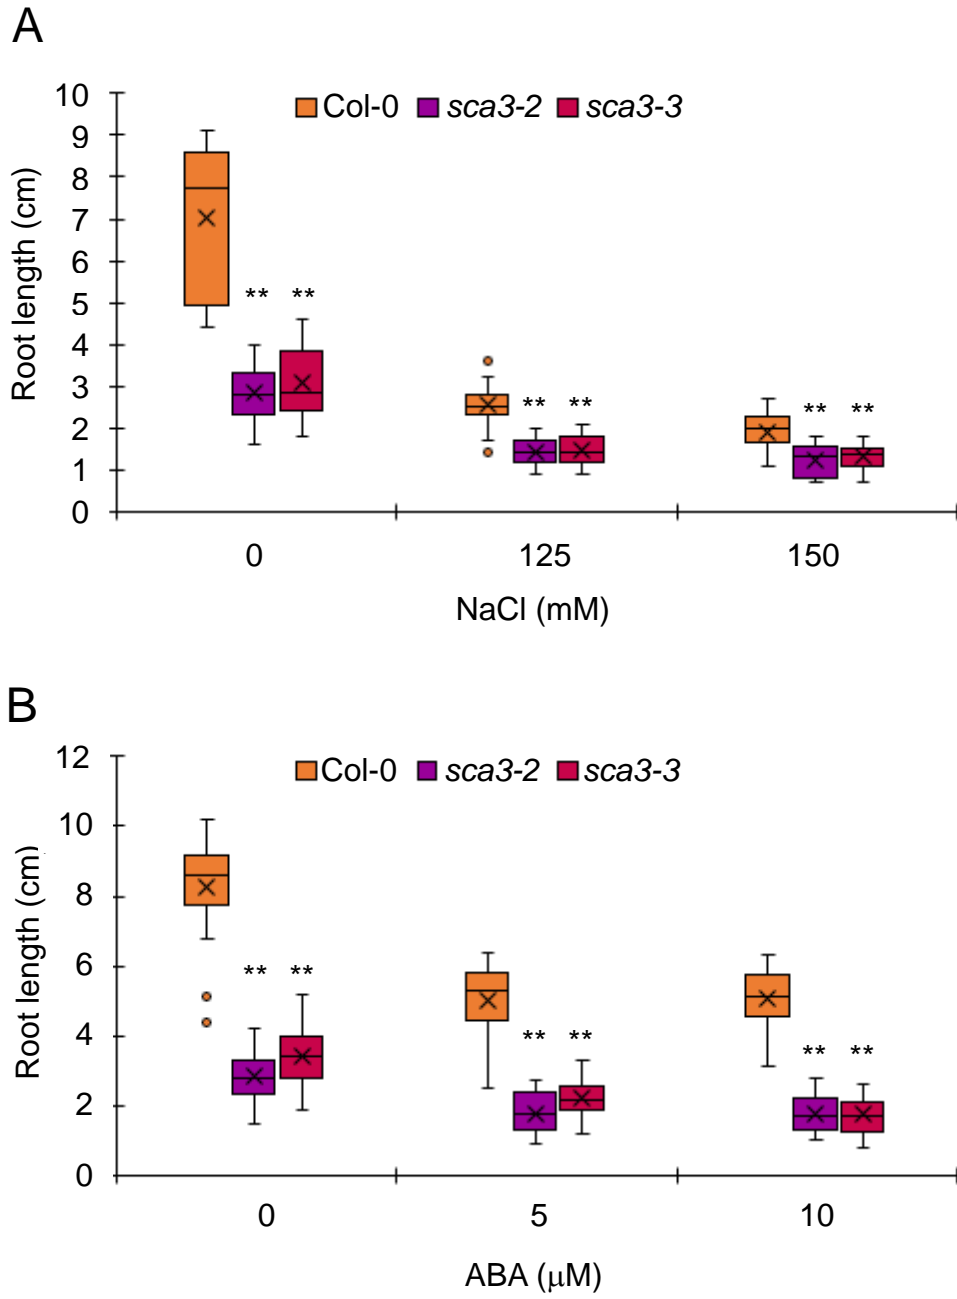

Supplement: s1 [file s1]
